# Supplementary material
Source: PubMed Central journal article supplement (PMC3198329)
Supplement: 1110577108_pnas.201110577SI.pdf [file 1110577108_pnas.201110577SI.pdf]

# Supporting Information

Wakimoto et al. 10.1073/pnas.1110577108

## SI Materials and Methods

**General Experimental Procedures.** Lyprinol was kindly provided by MacLab Australia. Naproxen and ethyl eicosapentaenoate were purchased from Wako Pure Chemical Industries and Tokyo Chemical Industry, respectively.  $^1\text{H}$  and  $^{13}\text{C}$  NMR spectra were obtained on a JEOL ECA-500 spectrometer at 500 and 125 MHz, respectively. Mass spectra were measured on a JEOL MStation JMS-700 spectrometer. THF and  $\text{CH}_2\text{Cl}_2$  were distilled from sodium benzophenone ketyl and calcium hydride, respectively. Normal-phase chromatography was performed with silica gel columns (60N spherical, neutral, 40–50  $\mu\text{m}$ ; Kanto Chemical). GC-MS analysis was performed with a JEOL JMS-SUN200 mass spectrometer coupled to an Agilent 6890N gas chromatograph. GC was carried out with Agilent GC capillary column HP-5 (30 m  $\times$  0.25 mm i.d.) and the oven temperature was increased from 120  $^\circ\text{C}$  to 240  $^\circ\text{C}$  at 24  $^\circ\text{C}/\text{min}$ .

**Isolation of Furan Fatty Acids from Lyprinol.** Lyprinol is a lipid-rich fraction prepared by supercritical fluid [ $\text{CO}_2$ ] extraction of the freeze-dried stabilized powder of the green-lipped mussel *Perna canaliculus*. The lipid extract of the green-lipped mussel (2.98 g) was dissolved in  $\text{CH}_2\text{Cl}_2$  (80 mL). The resulting pale yellow solution was hydrogenated with Pd-C (80 mg) under a hydrogen atmosphere to transform the polyunsaturated fatty acids (PUFAs) to saturated fatty acids. After 3 h of stirring, the catalyst was removed by filtration. To the colorless solution was added freshly prepared diazomethane in diethyl ether until the yellow color was retained. After removal of the excess diazomethane by bubbling nitrogen, the methylated solution was concentrated in vacuo and the residue was purified by silica gel flash chromatography eluted with hexane, hexane:diethyl ether (99:1), hexane:diethyl ether (98:2), and hexane:diethyl ether (97:3) to afford the fraction containing the  $\text{F}_4$  methyl ester (0.8 mg/g; methyl-12,15-epoxy-13,14-dimethyloctadeca-12,14-dienoate) and the  $\text{F}_6$  methyl ester (1.2 mg/g; methyl-12,15-epoxy-13,14-dimethyleicosa-12,14-dienoate) (Fig. S1). Alternatively, isolation from total fatty acids in Lyprinol was performed after methanolysis with sodium methoxide as described in the following methods.

**Methods for the Preparation of Furan Fatty Acids.** To perform quantitative analysis and an anti-inflammatory test of the furan fatty acids, we developed two different methods for the preparation of furan fatty acids: (i) isolation from salmon testicle to yield the standard materials for GC-MS analysis and (ii) semisynthesis from shark metabolite to afford the internal standard for the GC-MS analysis and the materials for the anti-inflammatory test.

**Isolation of Furan Fatty Acids from Salmon Testicle.** Salmon (*Oncorhynchus keta*) were collected from the Yambetsu River in Hokkaido, Japan, in late September 2007. Freeze-dried testes (5 g) were dissolved in  $\text{CHCl}_3$  (10 mL) and MeOH (10 mL). To the solution was added freshly prepared sodium methoxide (1.0 M, 10 mL). After stirring for 20 min, the mixture was treated with 1.0 M HCl (100 mL) and extracted with  $\text{CHCl}_3$ . The organic layer was washed with brine and dried over  $\text{Na}_2\text{SO}_4$ . The resulting solution was further methylated by treatment with a diethyl ether solution of  $\text{CH}_2\text{N}_2$  until all of the free fatty acids were completely methylated. After removal of the excess diazomethane by bubbling nitrogen, the resulting solution was concentrated in vacuo and purified by silica gel flash chromatography, and eluted with hexane, hexane:diethyl ether (99:1), hexane:diethyl ether (98:2), and

hexane:diethyl ether (97:3) to afford the fractions containing furan fatty acids (F-acids). To remove the concomitant unsaturated fatty acid methyl esters, the fraction was hydrogenated with Pd-C (50 mg) under a hydrogen atmosphere for 5 min and then purified again by silica gel flash chromatography to yield the fractions containing both the  $\text{F}_4$  and  $\text{F}_6$  methyl esters (12 mg) (1–6).

**Semisynthesis of Furan Fatty Acids:  $\text{F}_6$  Ethyl Ester.** Bile was collected from sharks (*Lamna ditropis*) caught for commercial supply at Kesennuma in Miyagi Prefecture, Japan, in 2005. The lyophilized material (1.6 kg) was dissolved in methanol and treated with  $\text{H}_2\text{SO}_4$ . The resulting solution was neutralized with solid  $\text{NaHCO}_3$  and centrifuged (600  $\times$  g). The supernatant was concentrated in vacuo and partitioned between 1 M HCl and diethyl ether. To the ethereal solution (50 mL) was added  $\text{H}_2\text{O}$  (100 mL),  $\text{NaIO}_4$  (36 mg), and  $\text{OsO}_4$  (10 mL, 10 mg/mL in water). After stirring at room temperature for 2 d, the ethereal solution was washed with brine, dried over  $\text{MgSO}_4$ , and concentrated in vacuo. The resulting brown oil was purified by silica gel flash chromatography (hexane:AcOEt, 9:1) to yield the aldehyde (8.18 g). This aldehyde was immediately dissolved in  $\text{CH}_2\text{Cl}_2$ , because it would easily decompose in the neat oil state. To a solution of *n*-butyltriphenylphosphonium bromide, sodium bis(trimethylsilyl)amide (NaHMDS, 1.0 M THF solution) was added dropwise at  $-78^\circ\text{C}$ . To the yellow solution of *n*-butyltriphenylphosphonium ylide, the  $\text{CH}_2\text{Cl}_2$  solution of the aldehyde was added dropwise at  $-78^\circ\text{C}$ . The reaction mixture was stirred for 3 h at  $-78^\circ\text{C}$ , warmed to room temperature, and then concentrated in vacuo. The resulting oil was purified by silica gel flash chromatography (hexane:diethyl ether, 98:2) with a celite pad to yield the *cis*-olefin. The  $\text{CH}_2\text{Cl}_2$  solution of the *cis*-olefin was treated with Pd-C and stirred under a hydrogen atmosphere for 5 min. After the catalyst was removed by filtration through a celite pad, the mixture was purified by silica gel flash chromatography (hexane:diethyl ether, 98:2) to yield F-acid 2 (804 mg, 2.9 mmol). Subsequently, to a  $\text{CH}_2\text{Cl}_2$  solution of F-acid 2, diisobutylaluminum hydride (DIBAL) (1.0 M hexane solution) was added dropwise at  $-78^\circ\text{C}$ . The mixture was stirred for 2 h at  $-78^\circ\text{C}$ , warmed to 0  $^\circ\text{C}$ , and quenched with Rochelle salt. The biphasic solution was extracted with  $\text{CH}_2\text{Cl}_2$ , which was washed with brine, dried over  $\text{MgSO}_4$ , and concentrated in vacuo. The crude aldehyde was used for the next step without further purification. To a  $\text{CH}_2\text{Cl}_2$  solution of 6-ethoxy-6-oxohexyltriphenylphosphonium bromide, NaHMDS was added dropwise, followed by the solution of the aldehyde at  $-78^\circ\text{C}$ . After stirring for 2 h at  $-78^\circ\text{C}$  to room temperature, the mixture was concentrated in vacuo. The resulting oil was purified by silica gel flash chromatography (hexane:diethyl ether, 98:2) to yield the olefinic F-acid. To a  $\text{CH}_2\text{Cl}_2$  solution of the olefinic F-acid, Pd-C was added, and the mixture was stirred under a hydrogen atmosphere for 5 min. After removal of the catalyst, the solution was concentrated in vacuo. The resulting oil was purified by silica gel flash chromatography (hexane:diethyl ether, 98:2) to afford the F-acid ( $\text{F}_6$ ) ethyl ester 3 (103 mg, 0.27 mmol) (Fig. S2).

**(E)-5-(5-(2-Carboxyvinyl)-3,4-Dimethylfuran-2-yl)Pentanoic Acid (1).** FAB-MS  $m/z = 265$  (M-H) $^-$ ,  $^1\text{H-NMR}$  (500 MHz,  $\text{CD}_3\text{OD}$ )  $\delta_{\text{H}}$ : 7.41 (1H, d,  $J = 15$  Hz), 6.02 (1H, d,  $J = 15$  Hz), 2.62 (2H, t), 2.29 (2H, t), 2.03 (3H, s), 1.89 (3H, s), 1.63 (4H, m).  $^{13}\text{C-NMR}$  (125 MHz,  $\text{CD}_3\text{OD}$ )  $\delta_{\text{C}}$ : 176.3, 170.2, 154.0, 144.6, 129.4, 127.9, 117.9, 111.4, 33.4, 27.5, 25.4, 24.3, 7.4, 6.7.



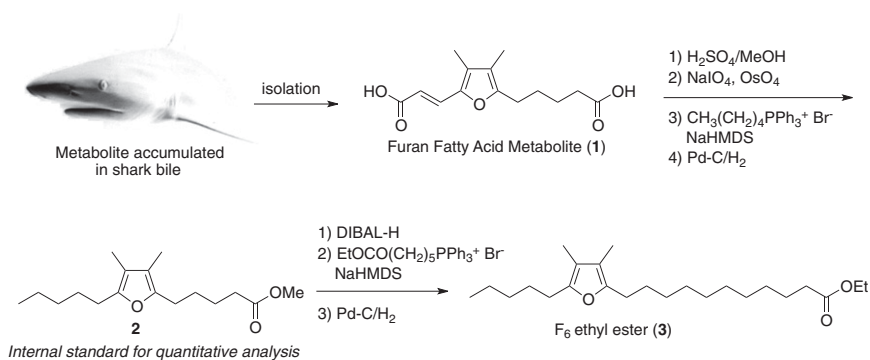

Fig. S2. Semisynthesis of furan fatty acid F<sub>6</sub>.

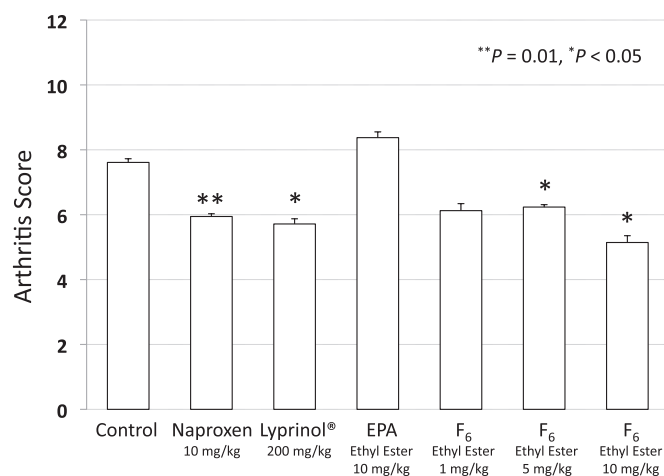

Fig. S3. Arthritis scores of the anti-inflammatory test. Error bars are SEM.

Table S1. Quantities of furan fatty acid methyl esters in Lyprinol

|               | F <sub>4</sub> methyl ester (mg/g) | F <sub>6</sub> methyl ester (mg/g) | Recovery rate (%) |
|---------------|------------------------------------|------------------------------------|-------------------|
| No. 1         | 1.89                               | 2.30                               | 97.8              |
| No. 2         | 2.00                               | 2.23                               | 97.5              |
| No. 3         | 1.74                               | 1.97                               | 92.1              |
| Mean $\pm$ SD | 1.88 $\pm$ 0.13                    | 2.17 $\pm$ 0.17                    | 95.8 $\pm$ 3.2    |
